# Supplementary material
Source: PubMed Central journal article supplement (PMC3170487)
Supplement: NIHMS315984-supplement-1_si_001.pdf [file NIHMS315984-supplement-1_si_001.pdf]

## **Supporting information**

### **On Orthogonal and Selective Activation of Glycosyl Thioimidates and Thioglycosides:**

#### **Application to Oligosaccharide Assembly**

**Sophon Kaeothip and Alexei V. Demchenko\***

*Department of Chemistry and Biochemistry, University of Missouri – St. Louis, One*

*University Boulevard, St. Louis, MO 63121, USA; E-mail: [demchenkoa@umsl.edu](mailto:demchenkoa@umsl.edu)*

#### **Contents:**

|                               |     |
|-------------------------------|-----|
| Spectra of compound <b>16</b> | S2  |
| Spectra of compound <b>17</b> | S4  |
| Spectra of compound <b>19</b> | S6  |
| Spectra of compound <b>28</b> | S8  |
| Spectra of compound <b>30</b> | S10 |
| Spectra of compound <b>31</b> | S12 |
| Spectra of compound <b>33</b> | S14 |
| Spectra of compound <b>34</b> | S16 |
| Spectra of compound <b>35</b> | S18 |
| Spectra of compound <b>36</b> | S20 |
| Spectra of compound <b>47</b> | S22 |
| Spectra of compound <b>49</b> | S24 |
| Spectra of compound <b>51</b> | S26 |
| Spectra of compound <b>52</b> | S28 |
| Spectra of compound <b>53</b> | S30 |
| Spectra of compound <b>55</b> | S32 |

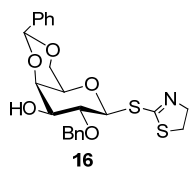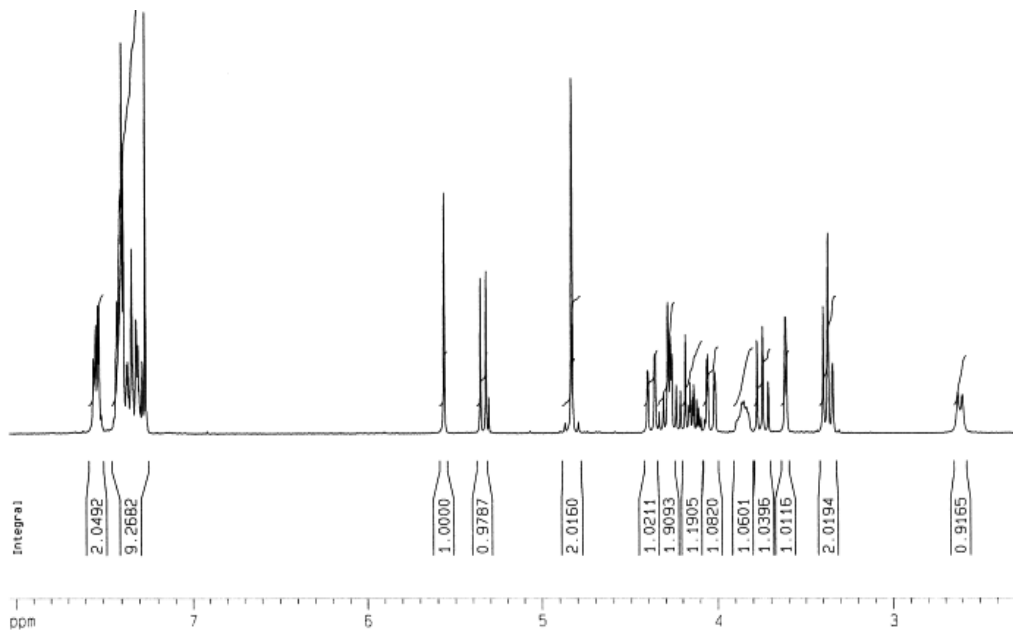

CDCl<sub>3</sub> 300 MHz

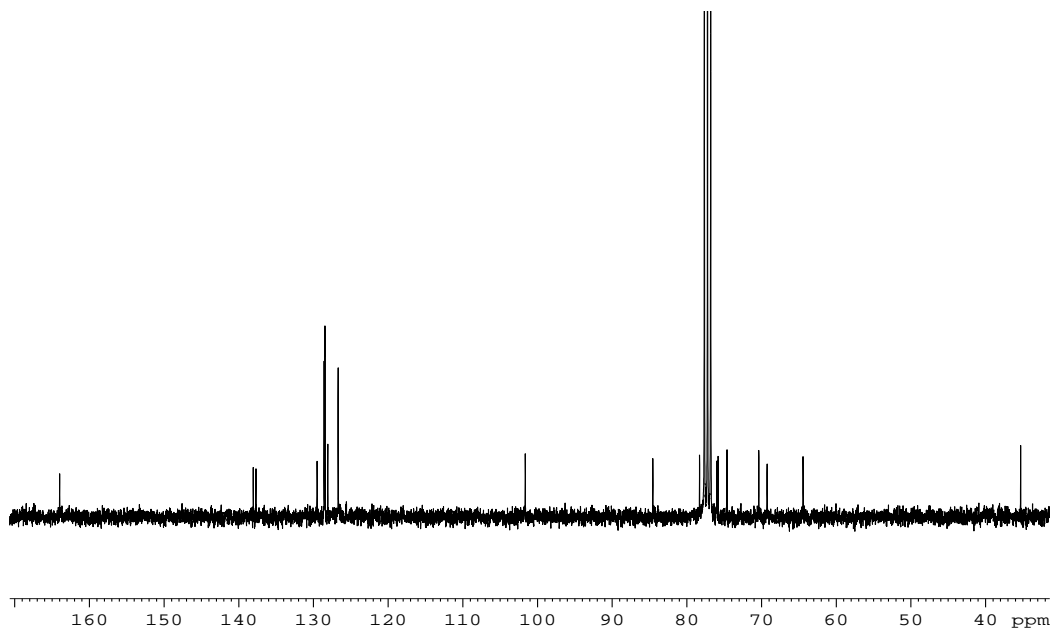

CDCl<sub>3</sub> 75 MHz

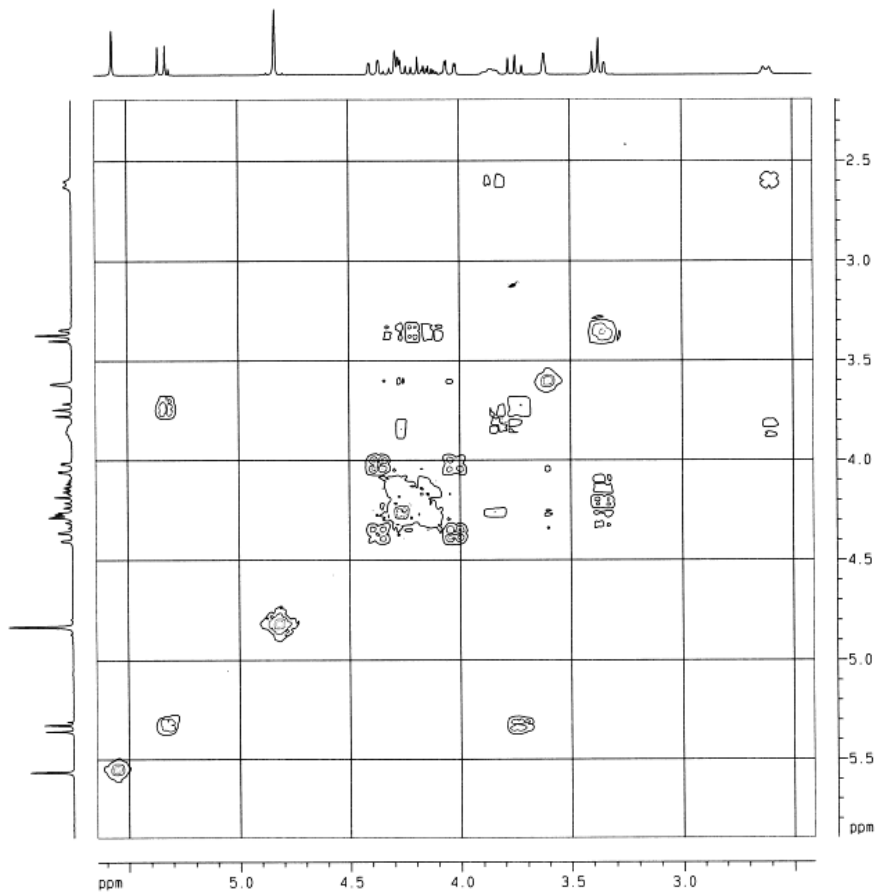

CDCl<sub>3</sub> 300 MHz

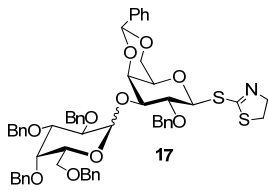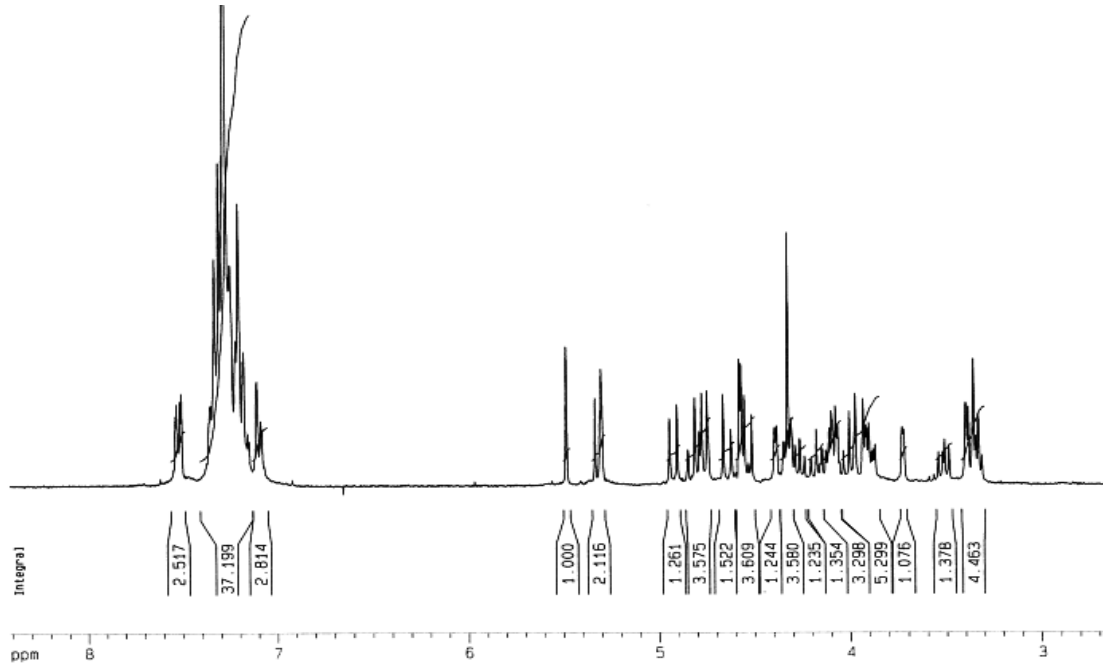

CDCl<sub>3</sub> 300 MHz

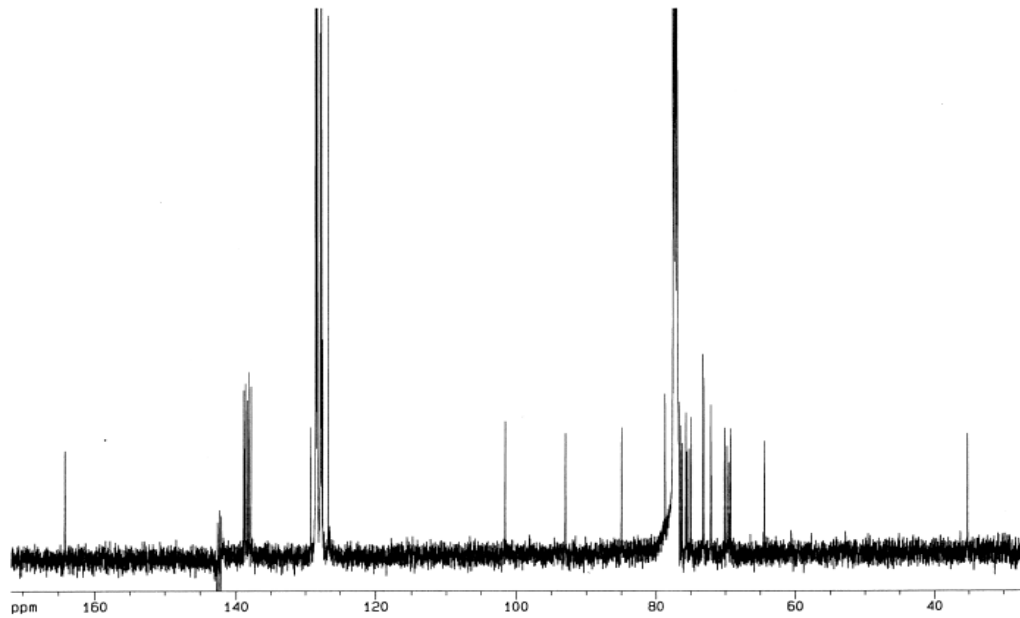

CDCl<sub>3</sub> 125 MHz

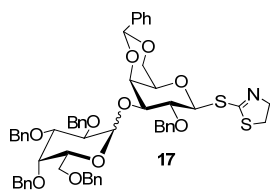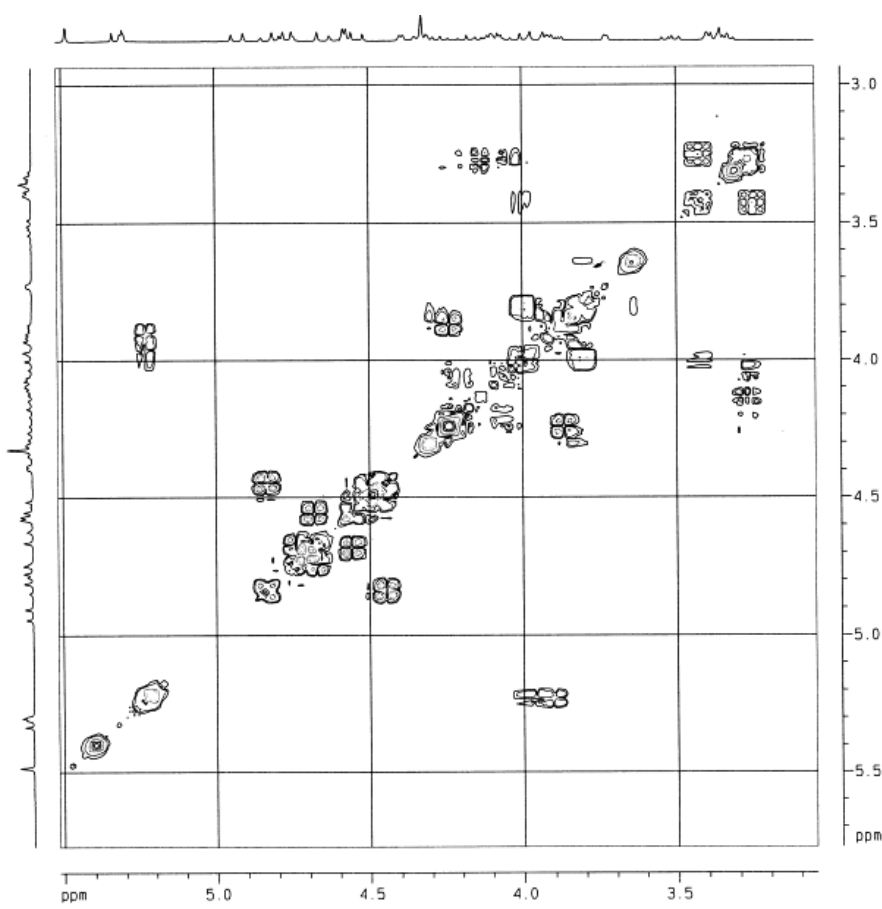

CDCl<sub>3</sub> 300 MHz

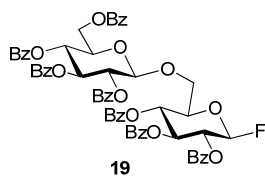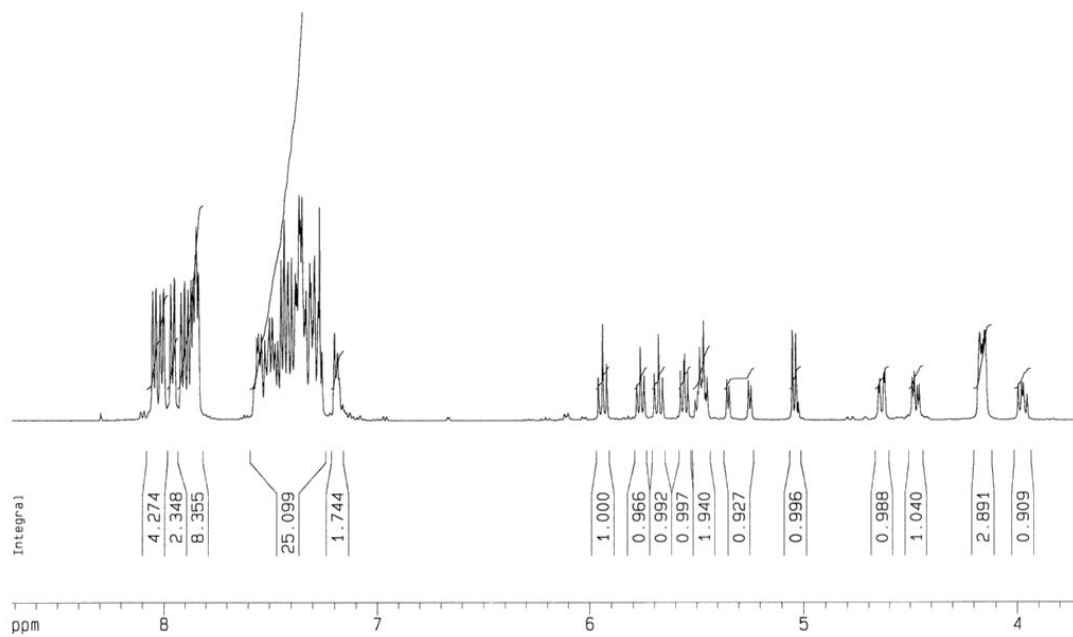

CDCl<sub>3</sub> 500 MHz

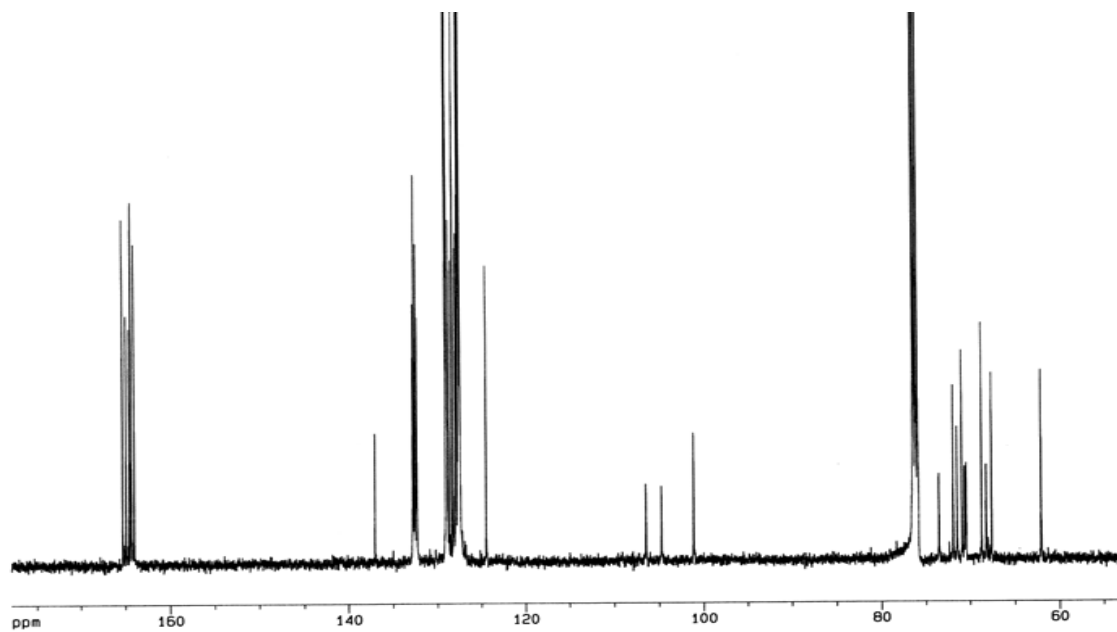

CDCl<sub>3</sub> 125 MHz

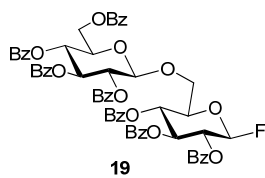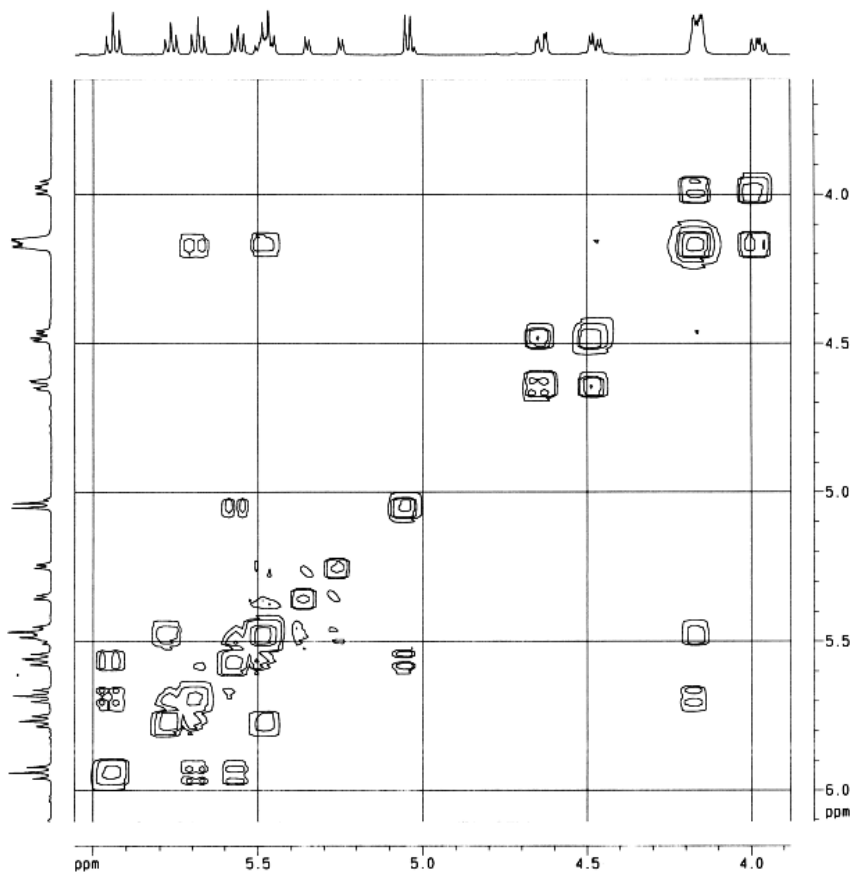

CDCl<sub>3</sub> 500 MHz





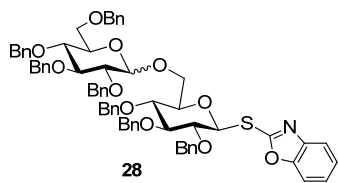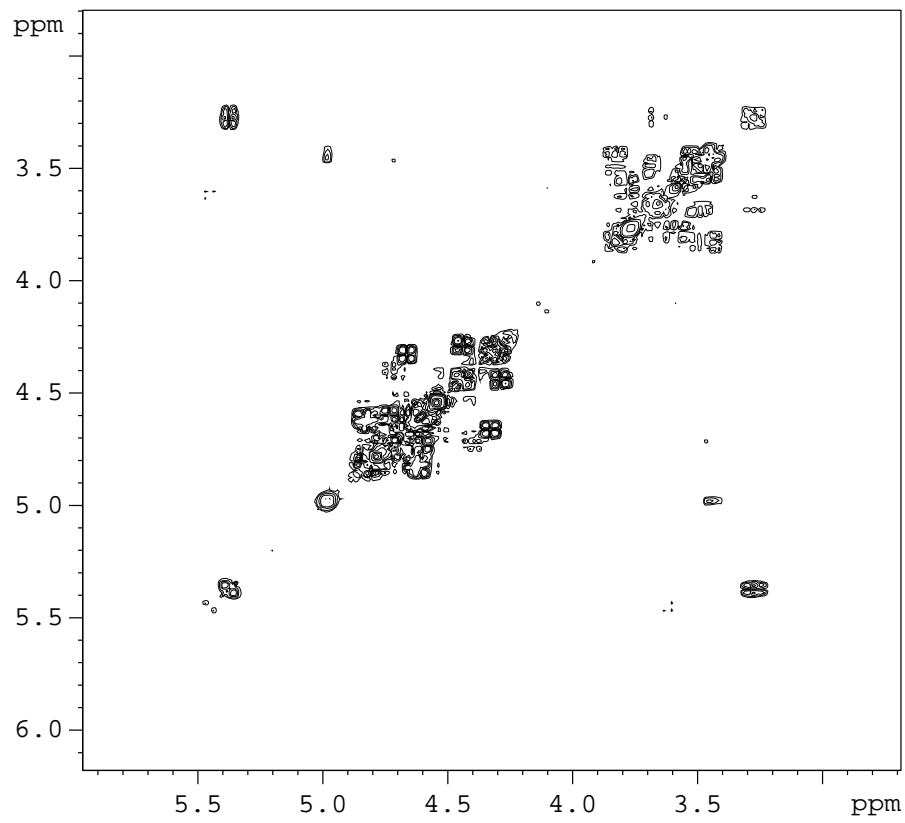

CDCl<sub>3</sub> 300 MHz

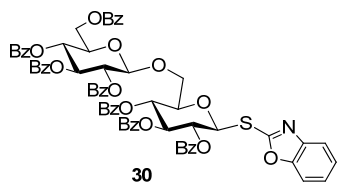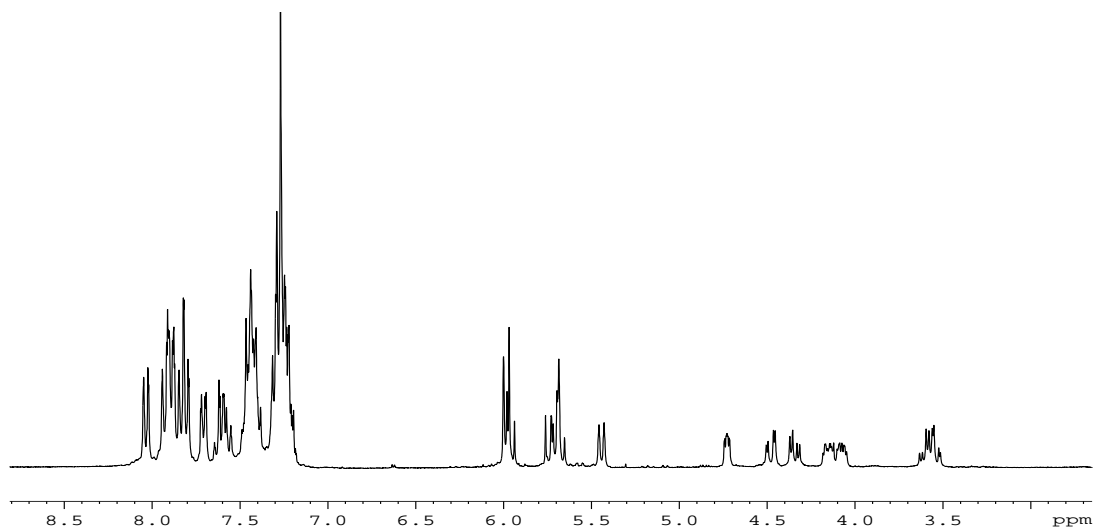

$\text{CDCl}_3$  300 MHz

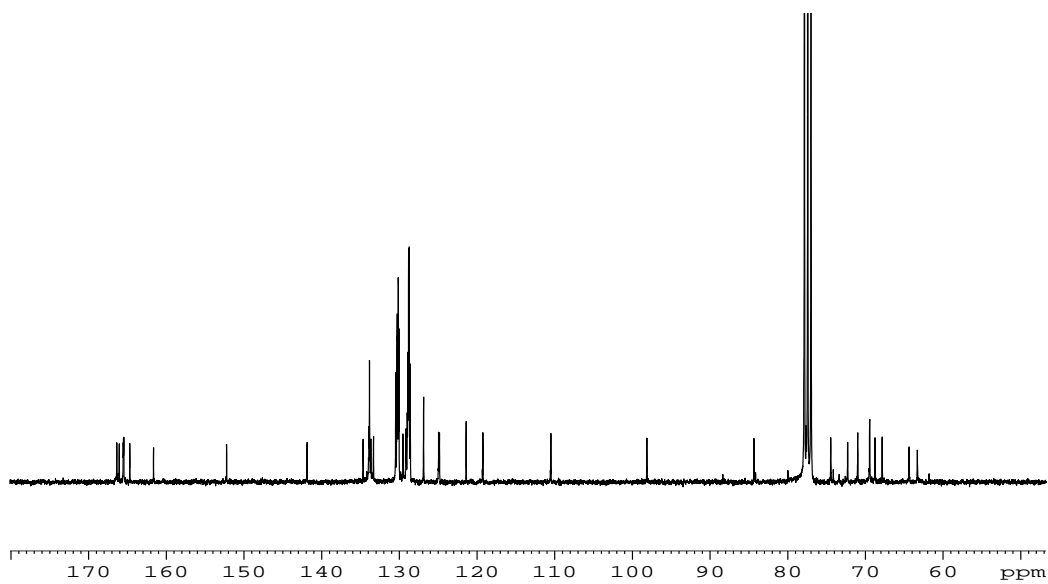

$\text{CDCl}_3$  75 MHz

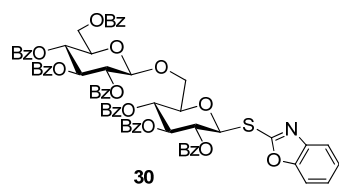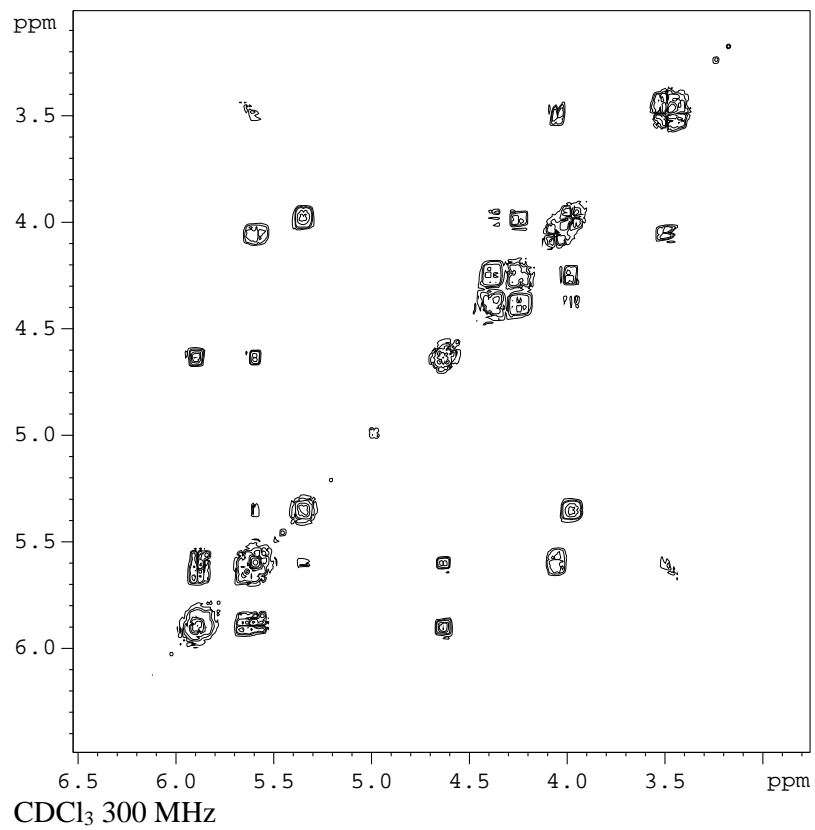

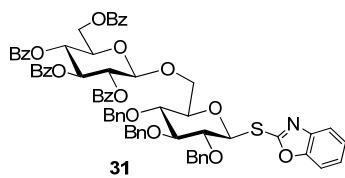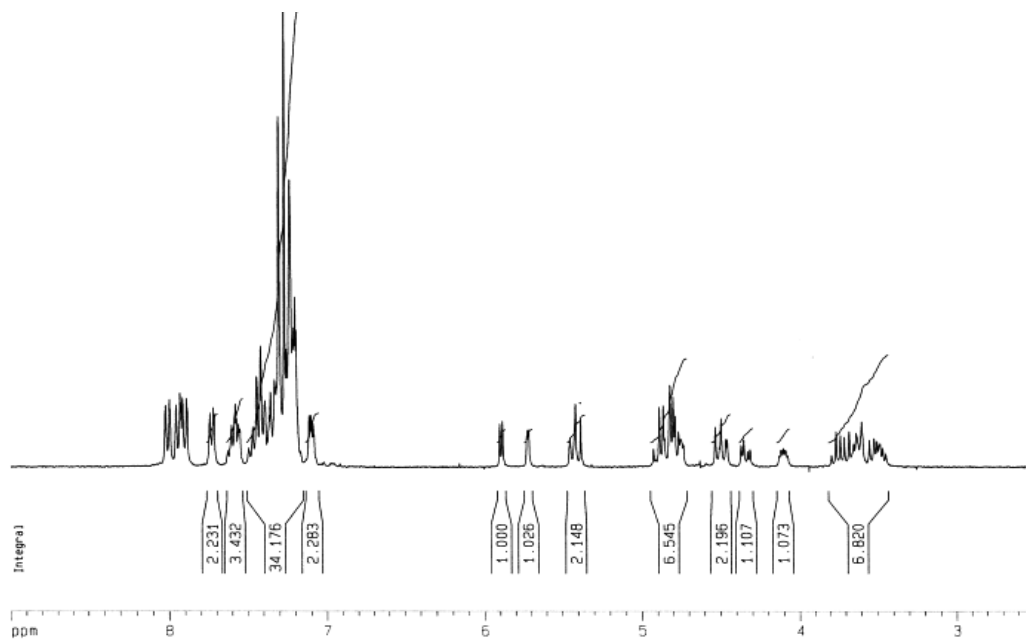

CDCl<sub>3</sub> 300 MHz

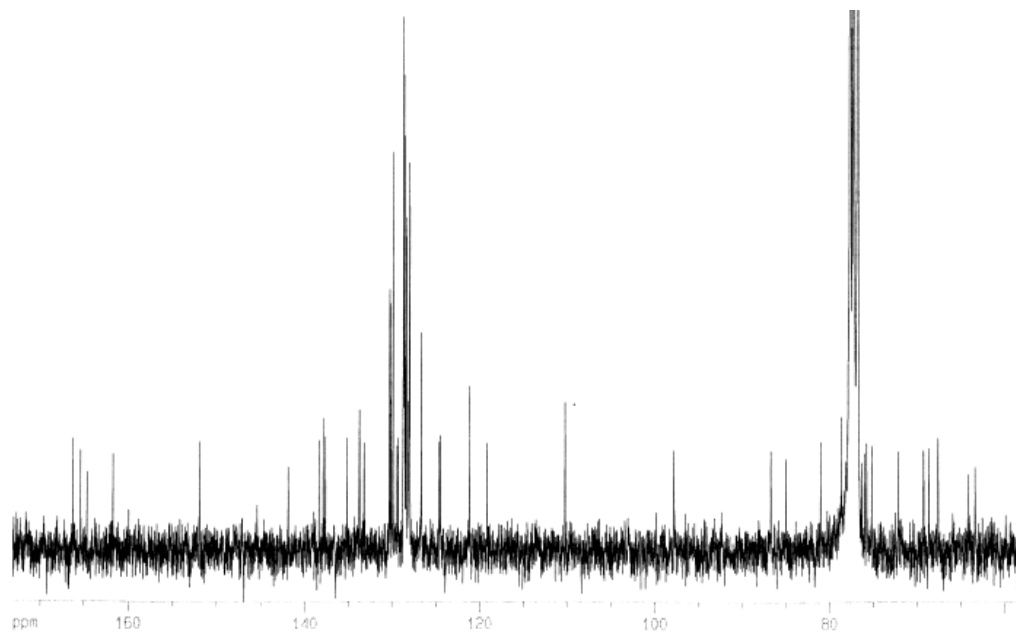

CDCl<sub>3</sub> 75 MHz

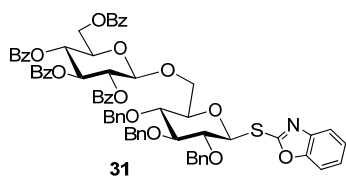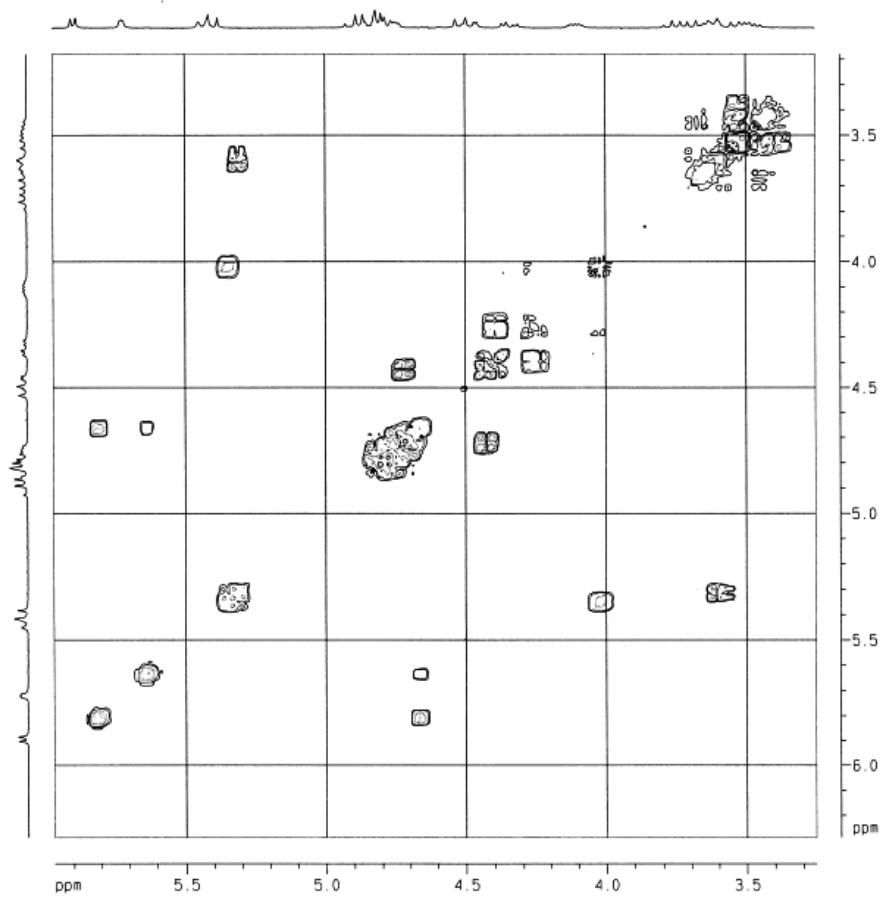

CDCl<sub>3</sub> 300 MHz

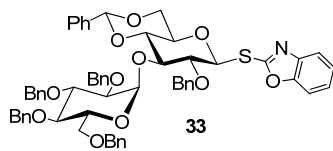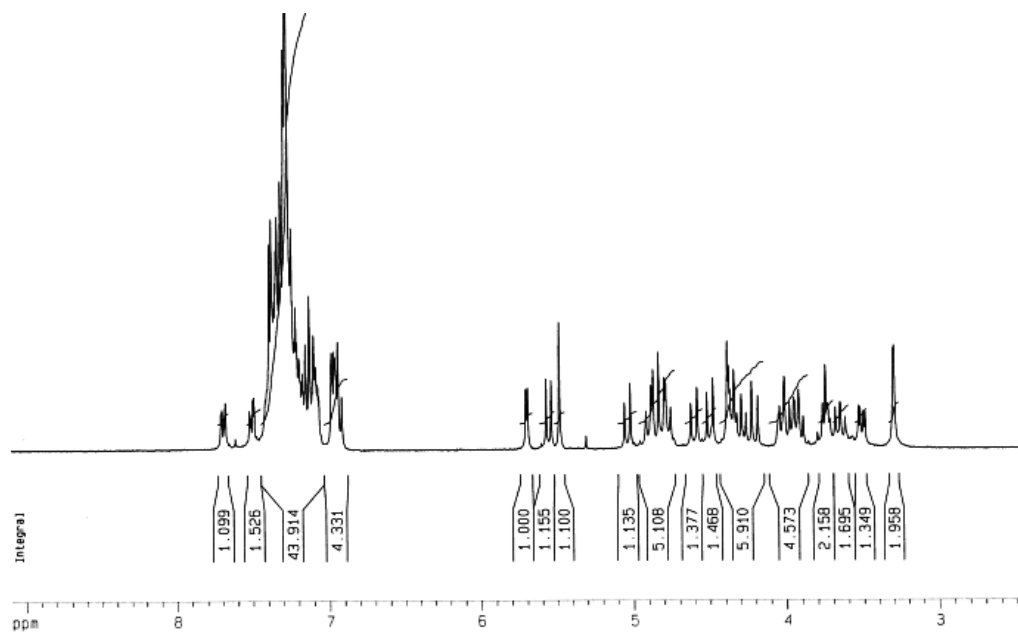

CDCl<sub>3</sub> 300 MHz

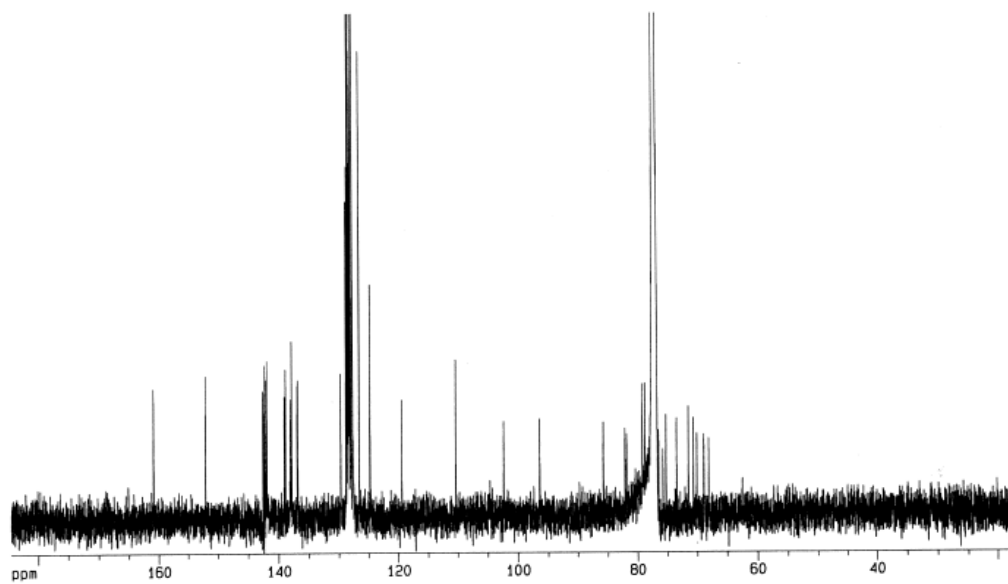

CDCl<sub>3</sub> 125 MHz

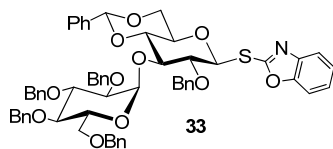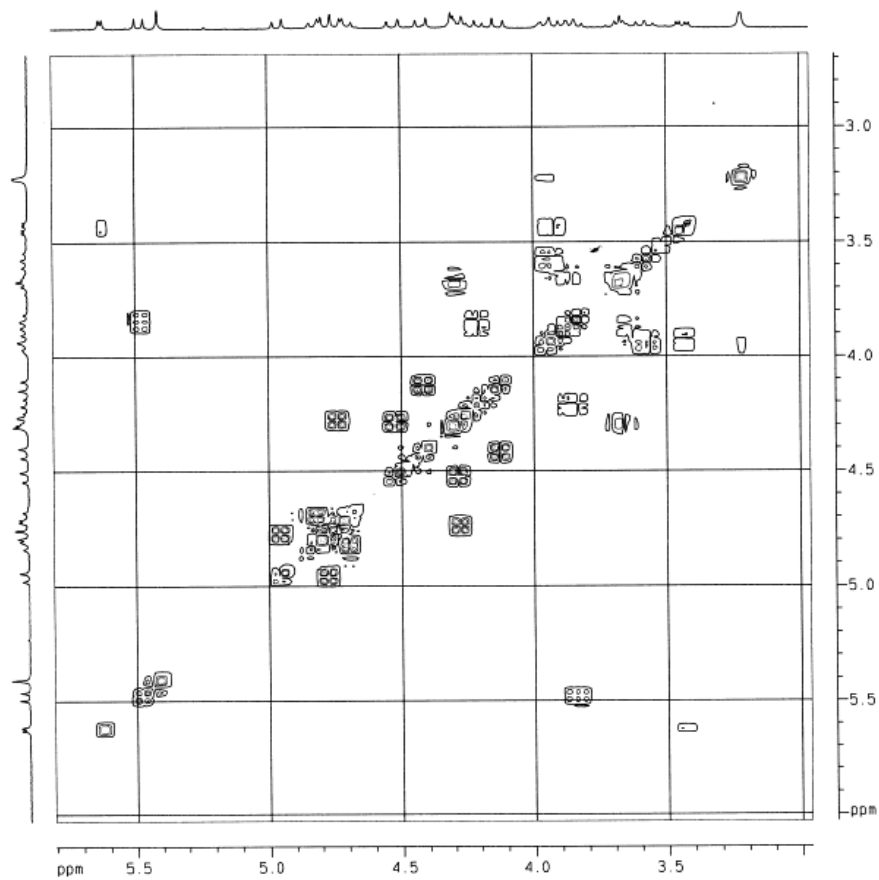

CDCl<sub>3</sub> 300 MHz

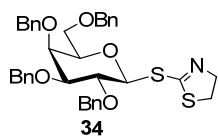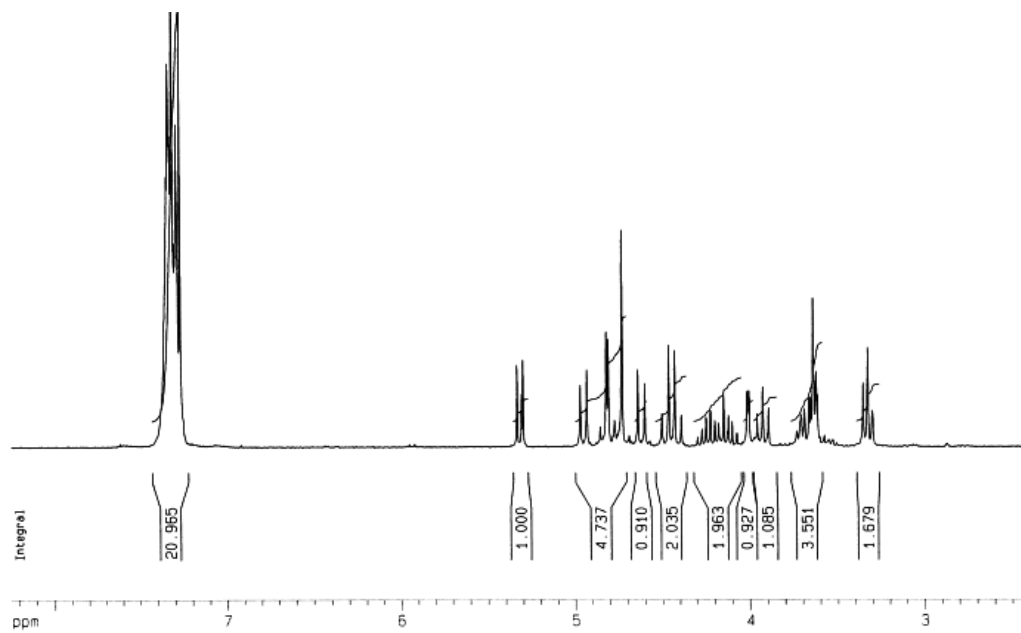

CDCl<sub>3</sub> 300 MHz

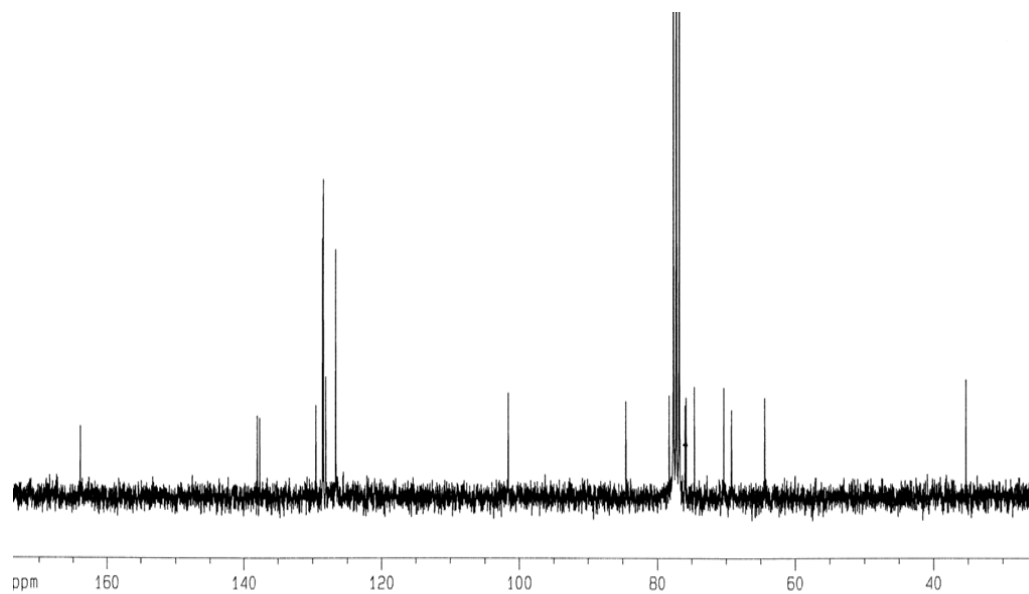

CDCl<sub>3</sub> 75 MHz



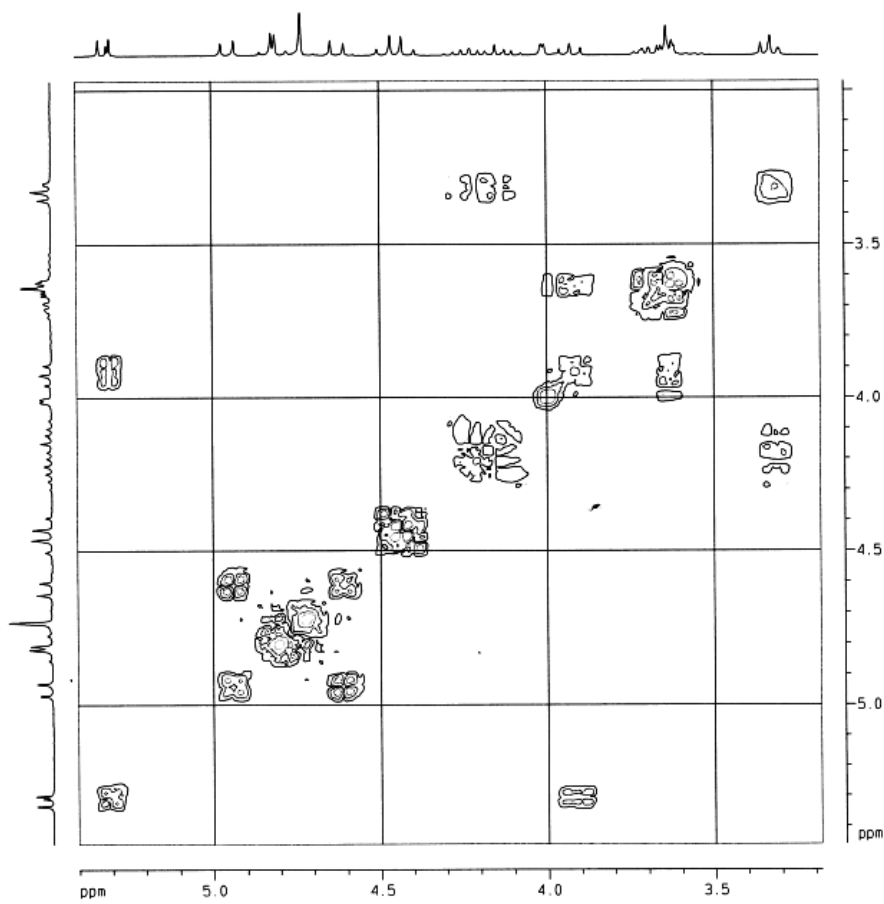

$\text{CDCl}_3$  300 MHz

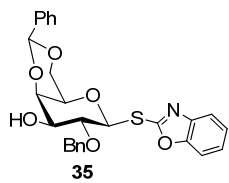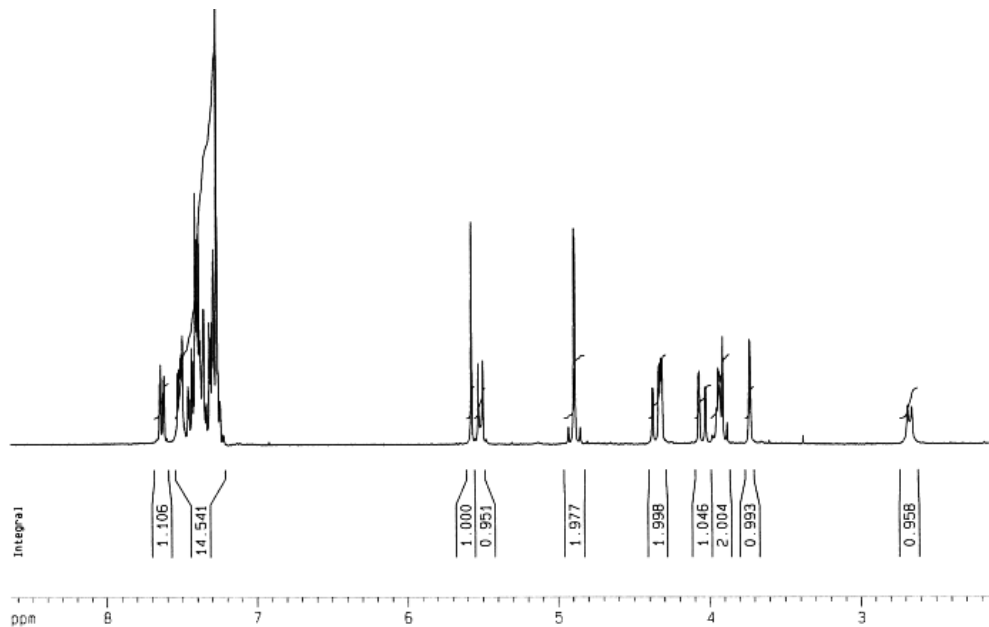

CDCl<sub>3</sub> 300 MHz

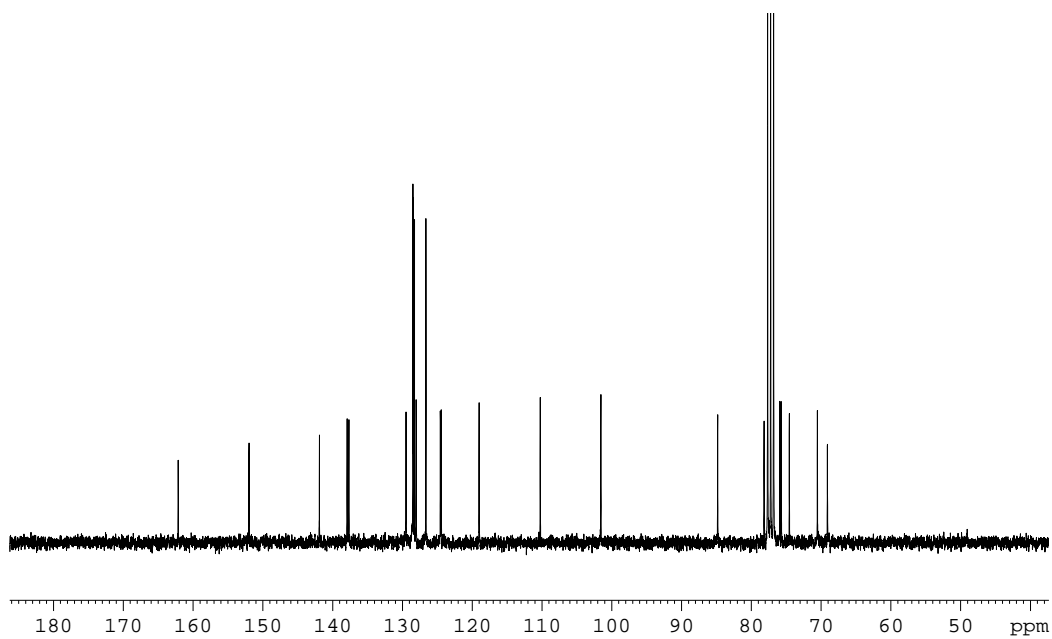

CDCl<sub>3</sub> 75 MHz

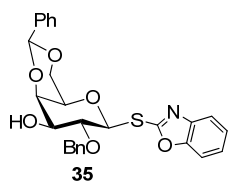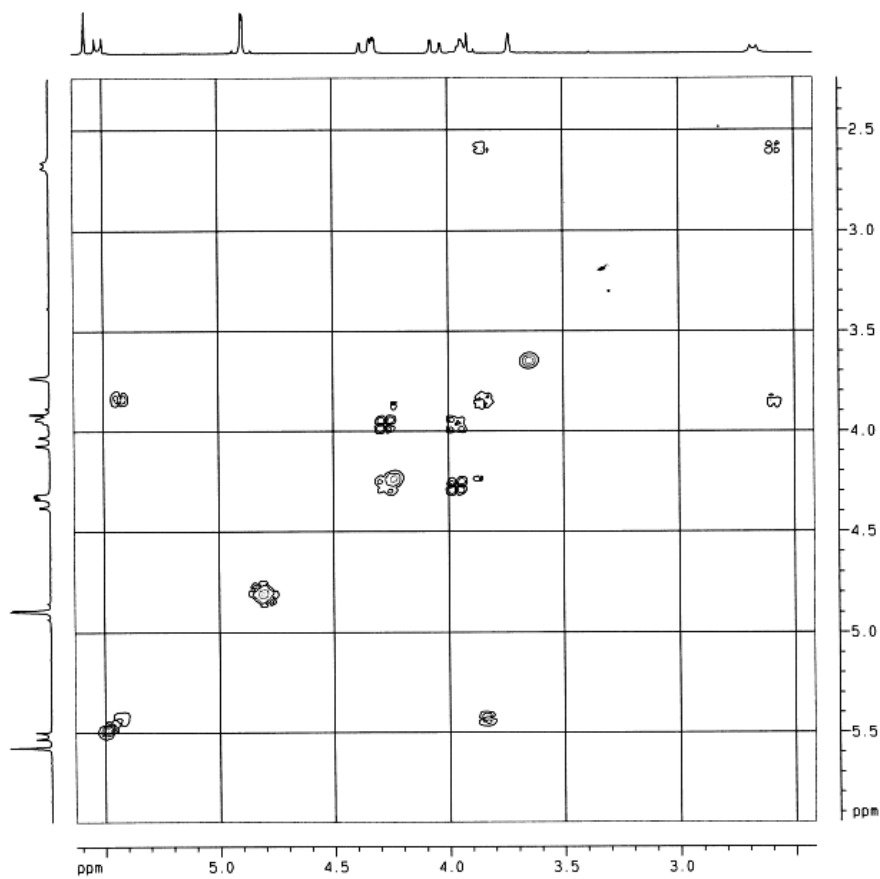

CDCl<sub>3</sub> 300 MHz

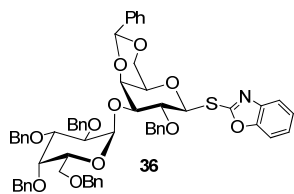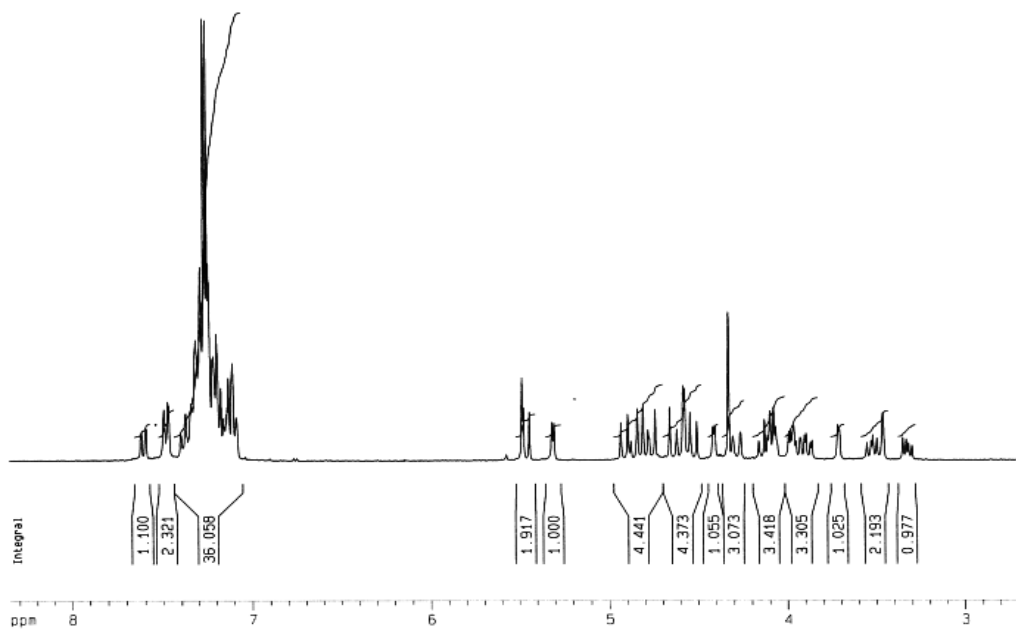

CDCl<sub>3</sub> 300 MHz

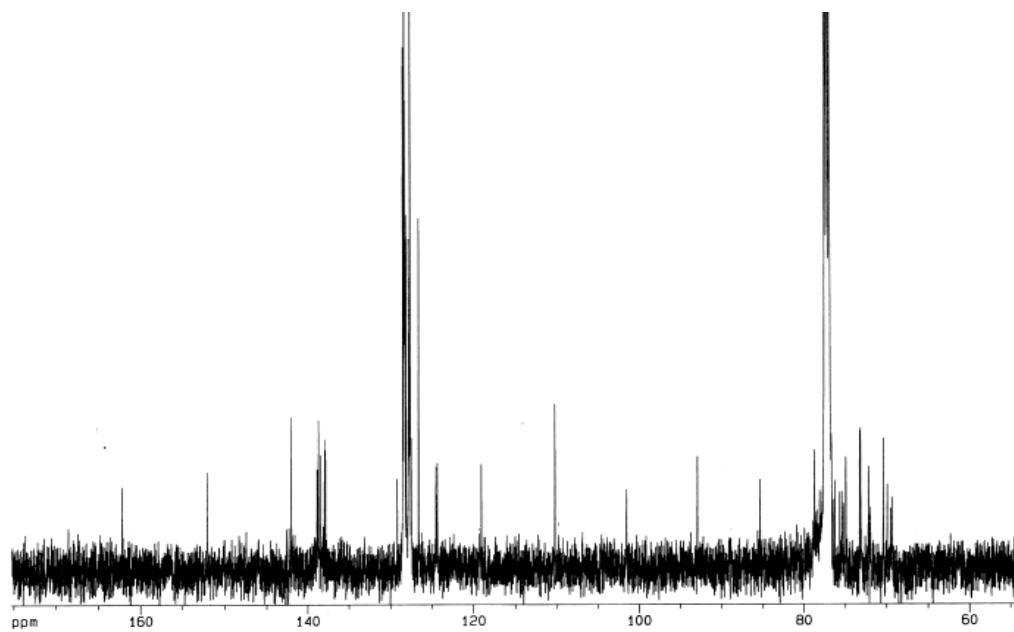

CDCl<sub>3</sub> 125 MHz

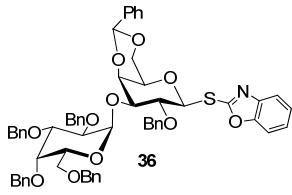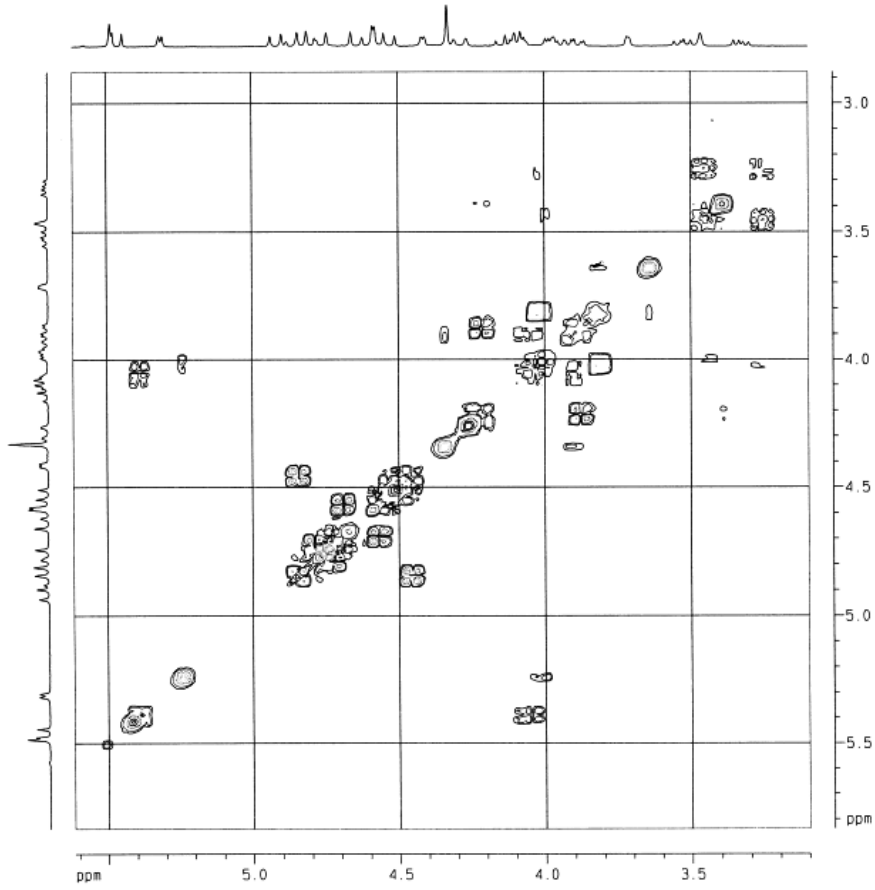

CDCl<sub>3</sub> 300 MHz

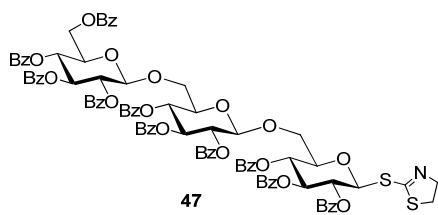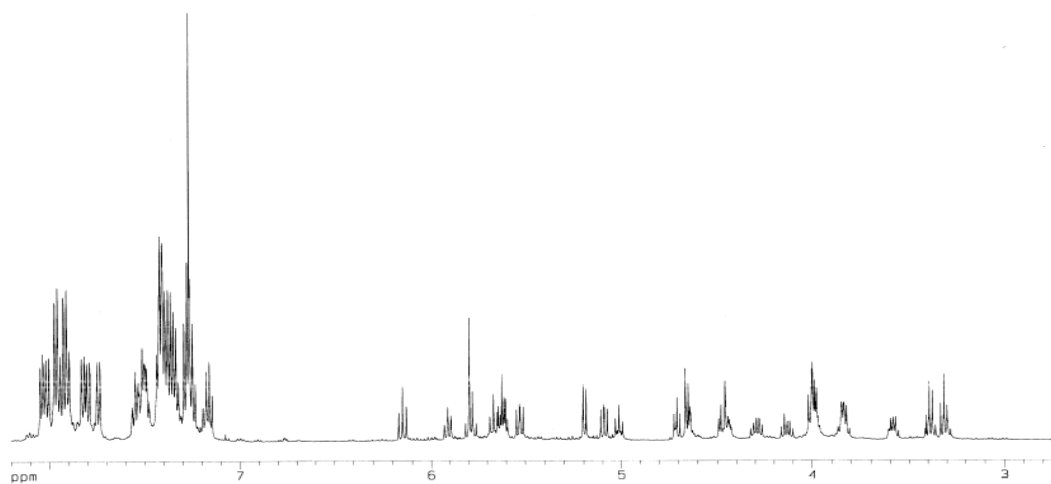

CDCl<sub>3</sub> 500 MHz

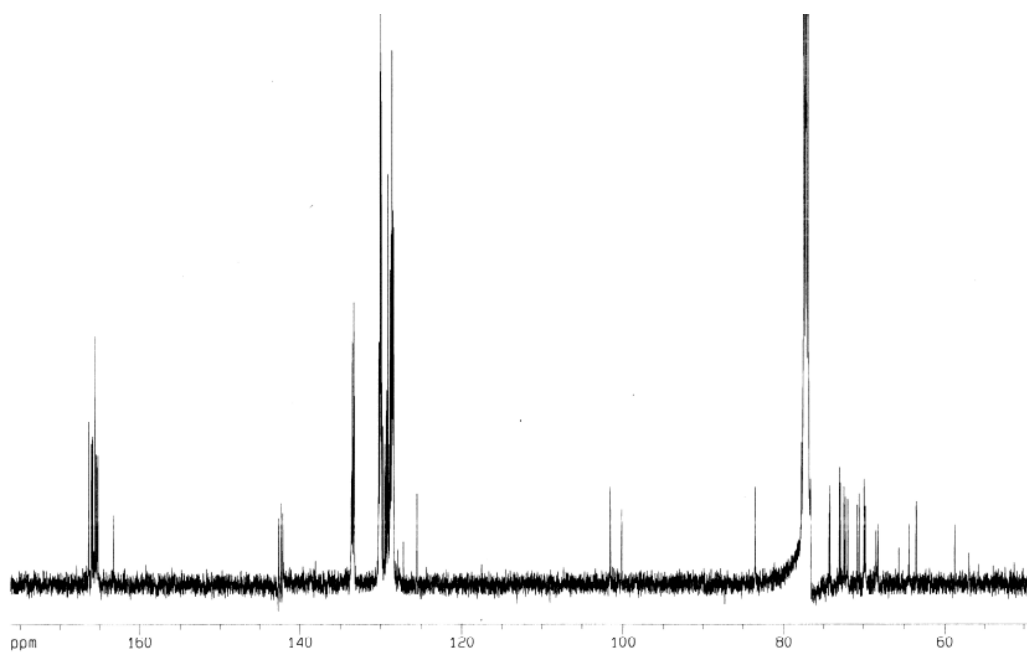

CDCl<sub>3</sub> 125 MHz

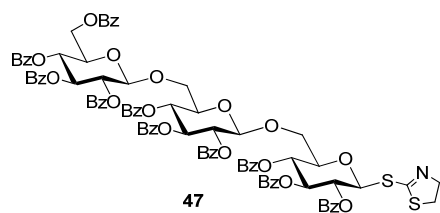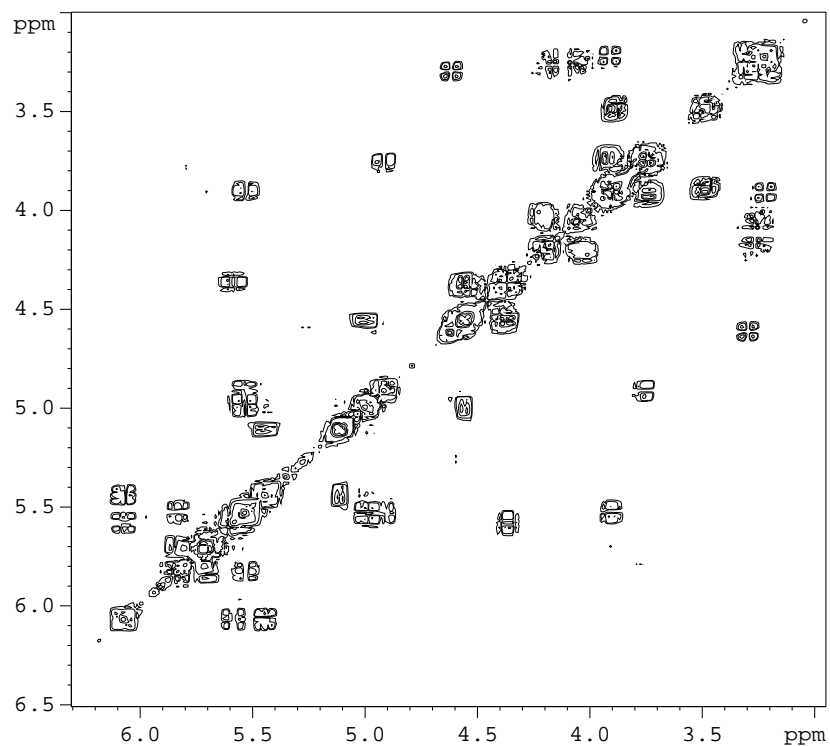

CDCl<sub>3</sub> 500 MHz

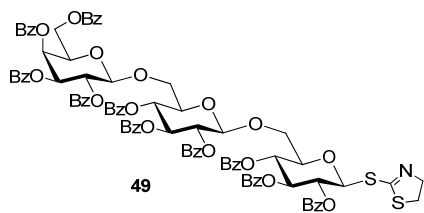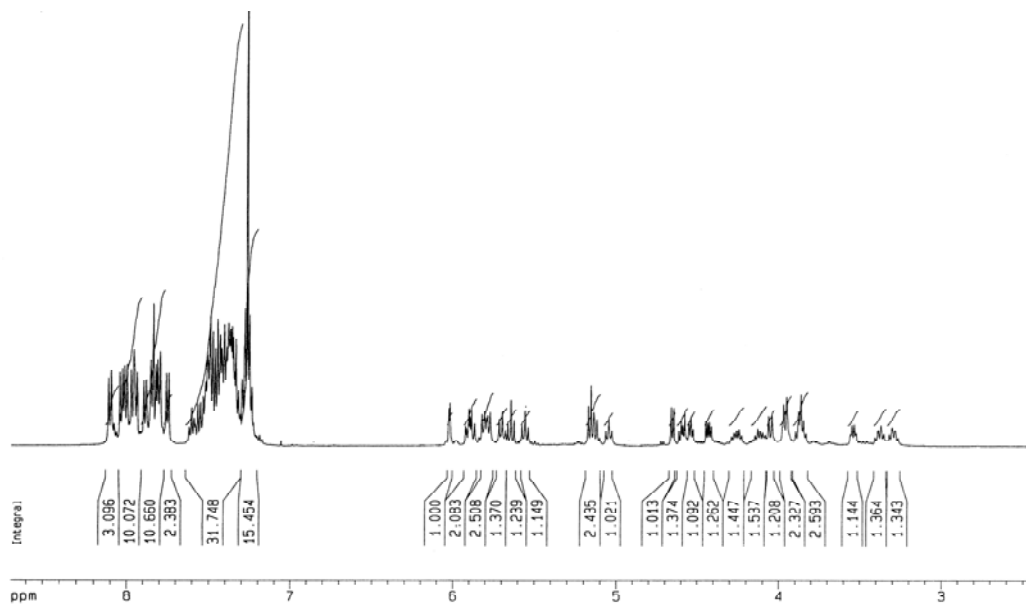

CDCl<sub>3</sub> 500 MHz

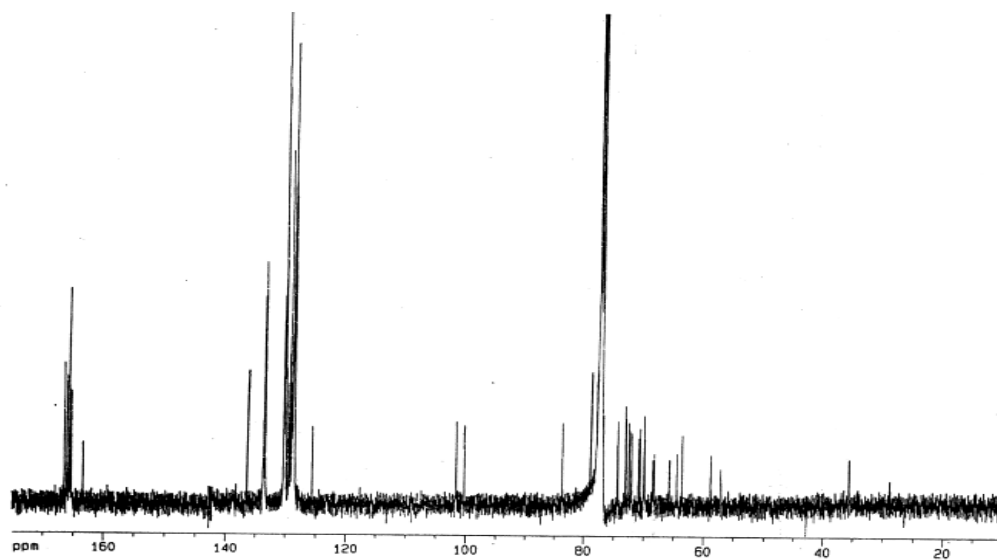

CDCl<sub>3</sub> 125 MHz



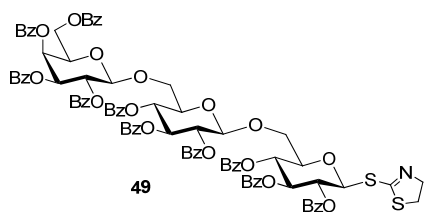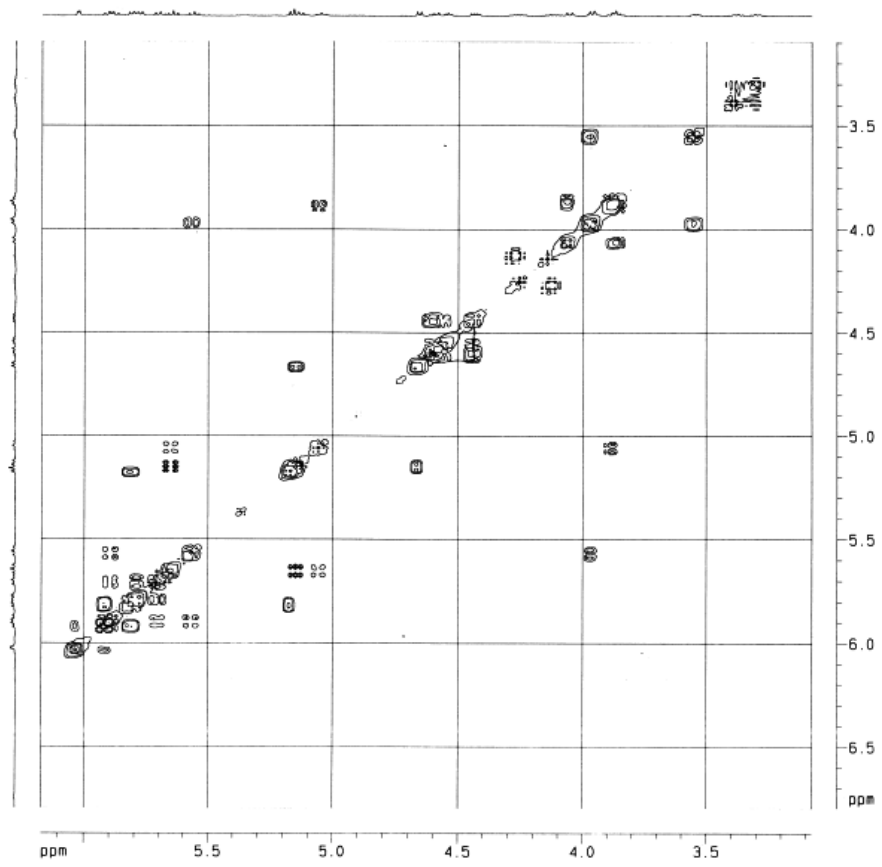

CDCl<sub>3</sub> 500 MHz

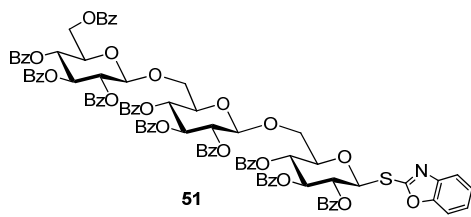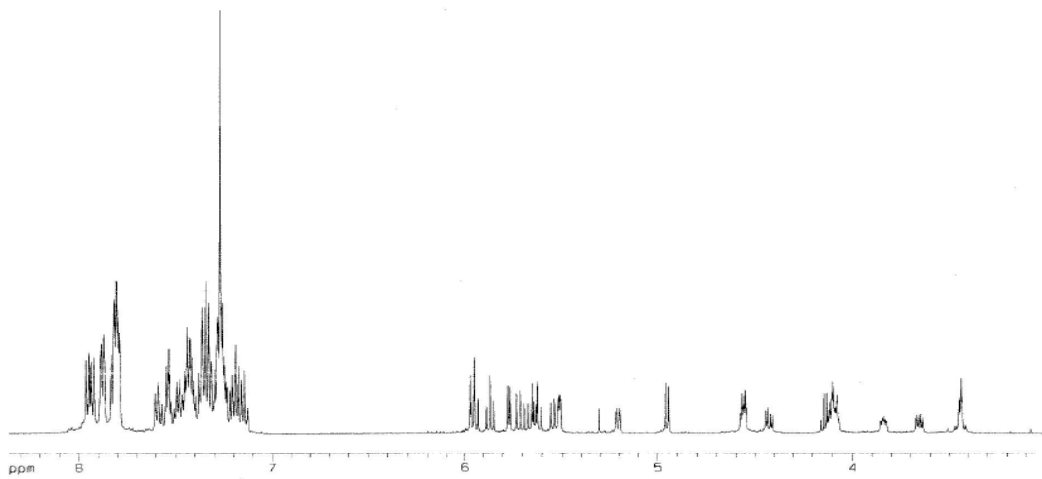

CDCl<sub>3</sub> 500 MHz

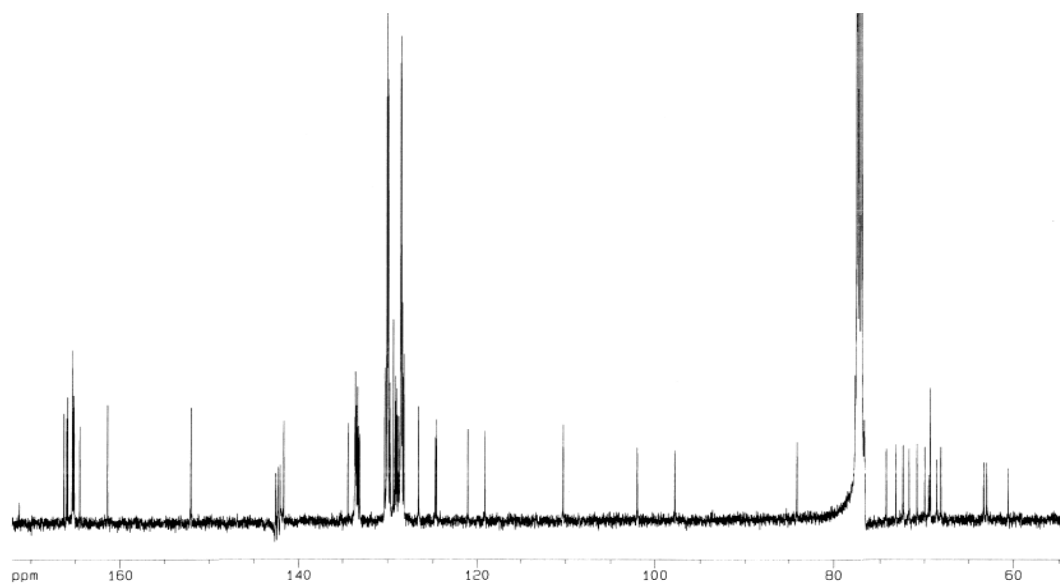

CDCl<sub>3</sub> 125 MHz

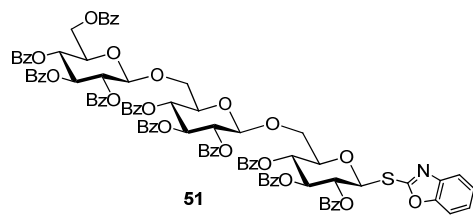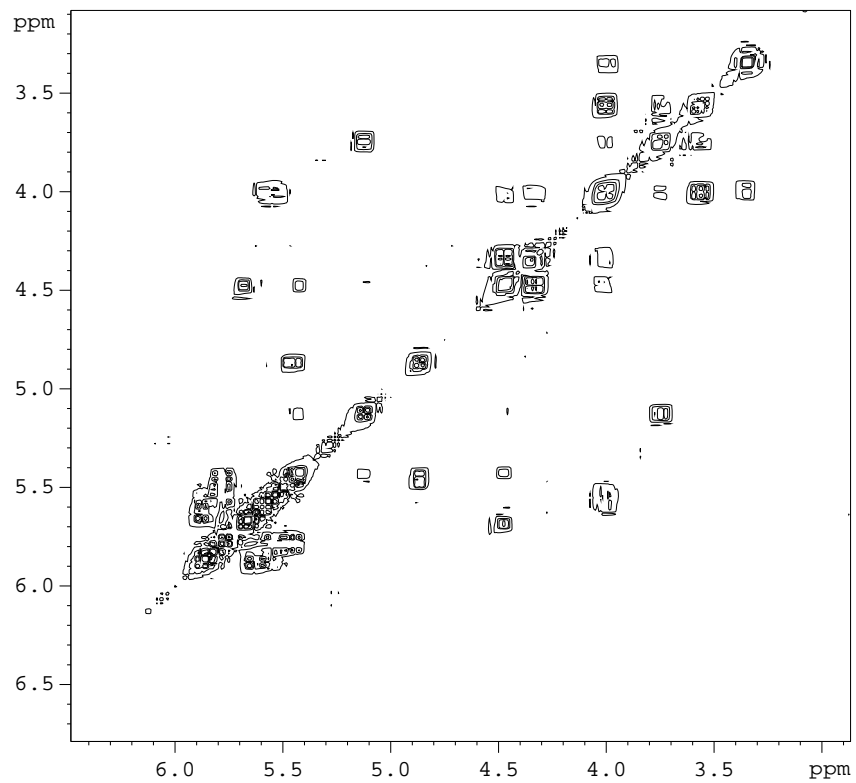

CDCl<sub>3</sub> 500 MHz

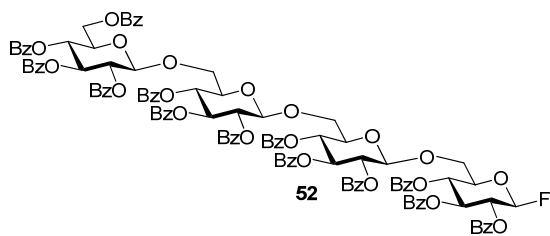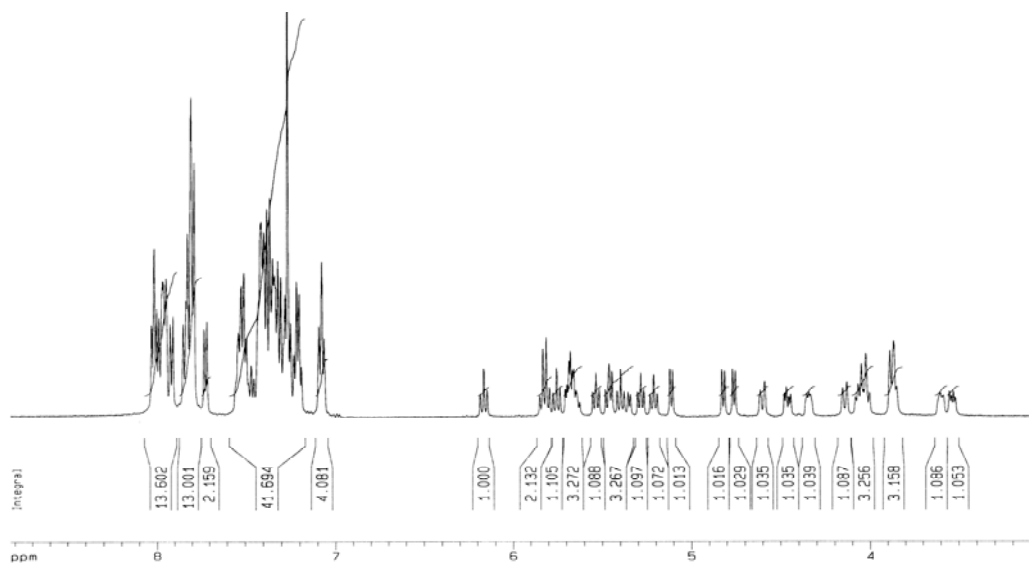

$\text{CDCl}_3$  500 MHz

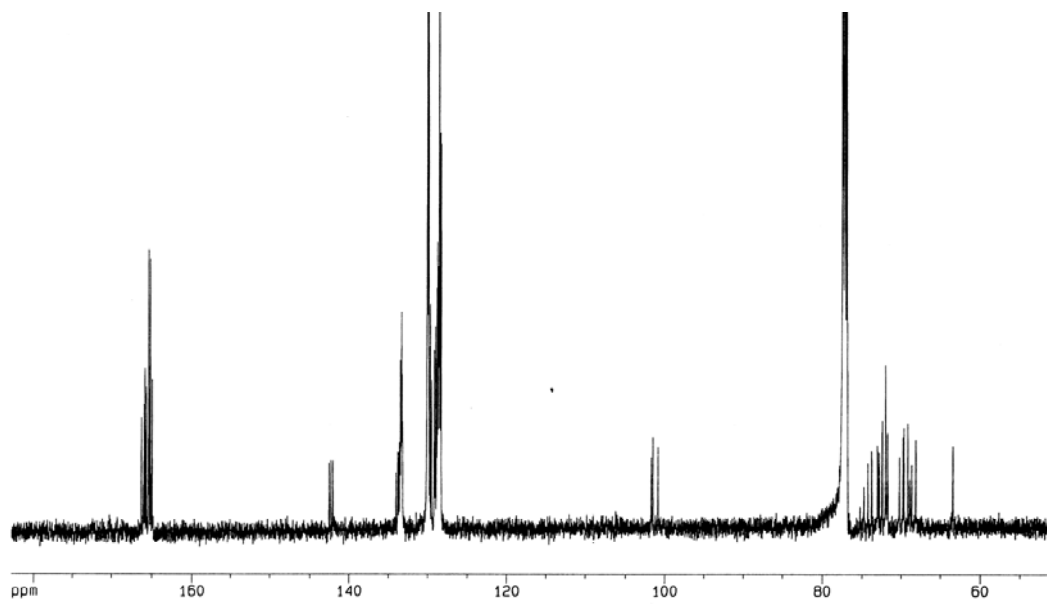

$\text{CDCl}_3$  125 MHz

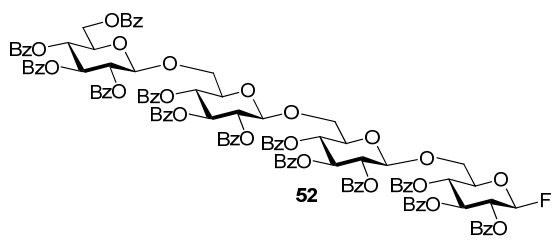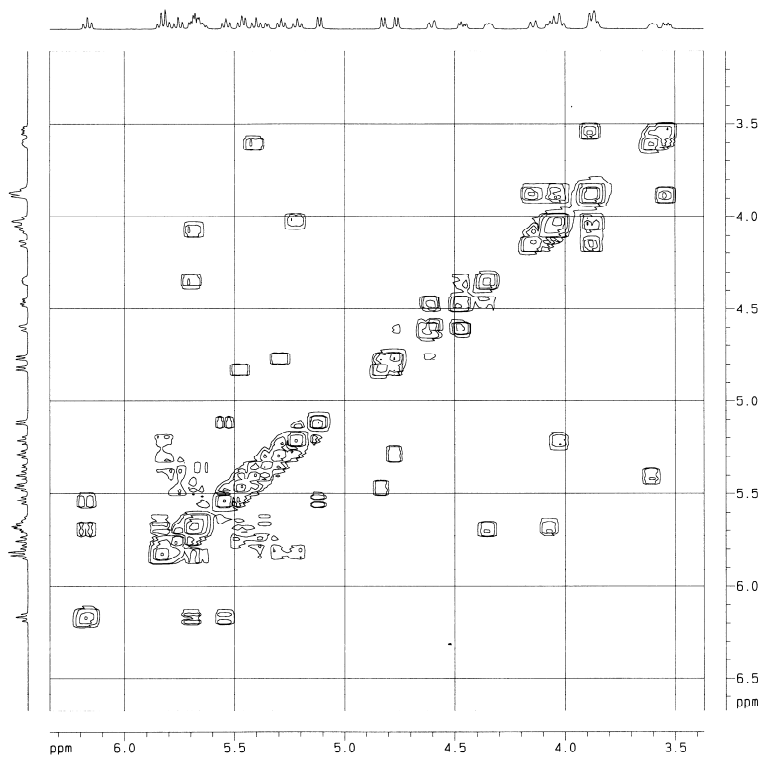

CDCl<sub>3</sub> 500 MHz

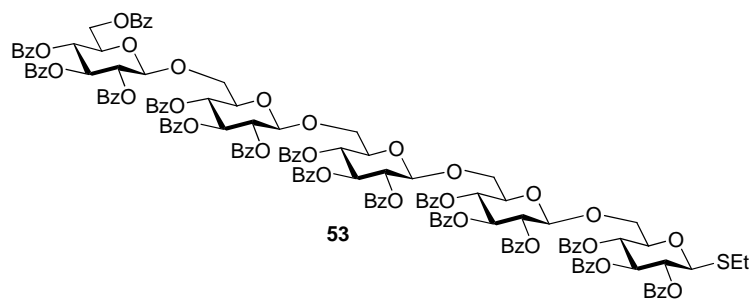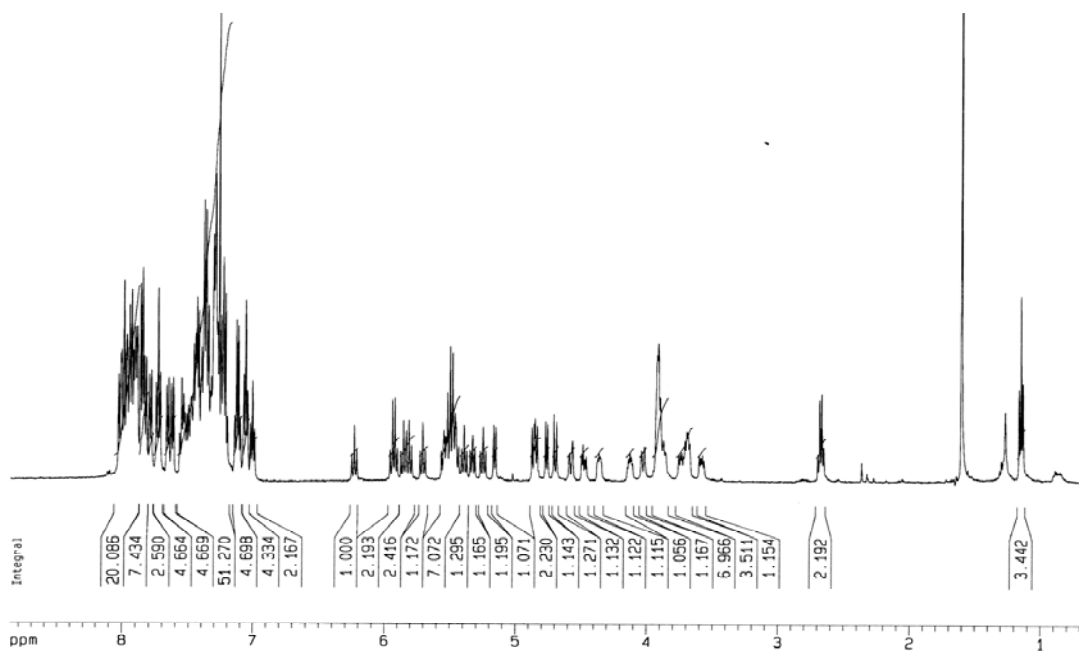

CDCl<sub>3</sub> 500 MHz

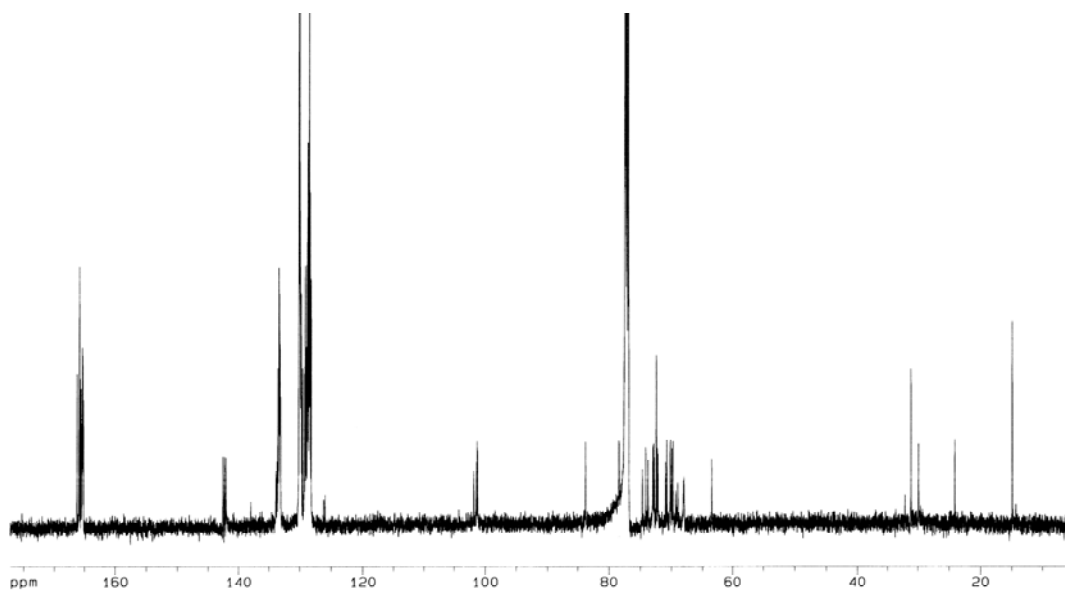

CDCl<sub>3</sub> 125 MHz

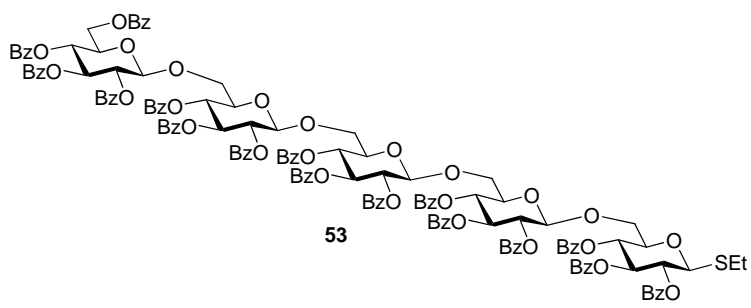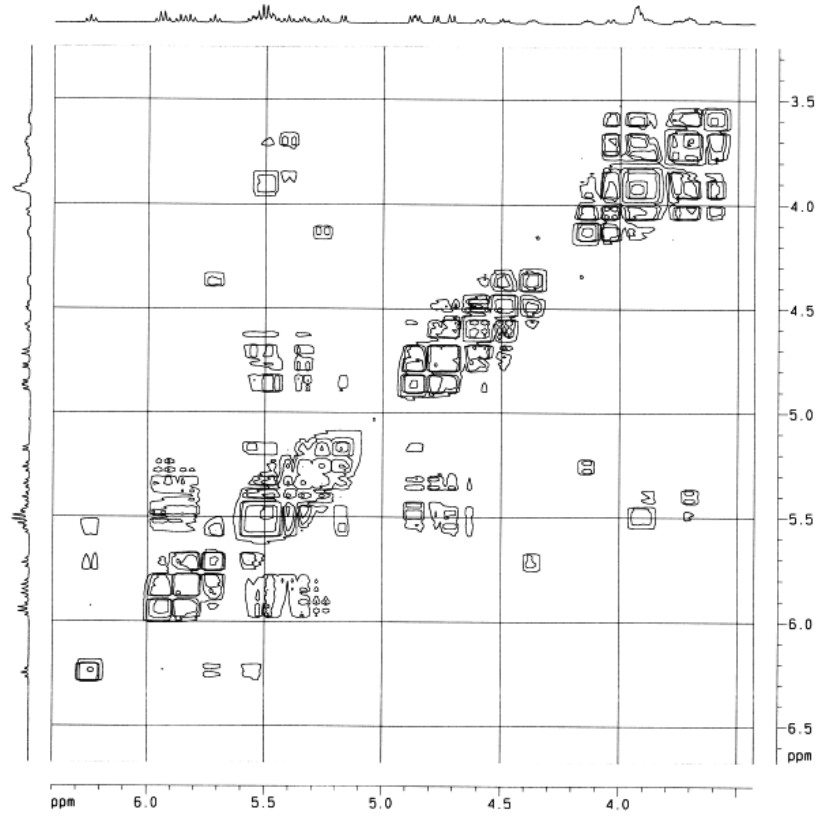

$CDCl_3$  500 MHz

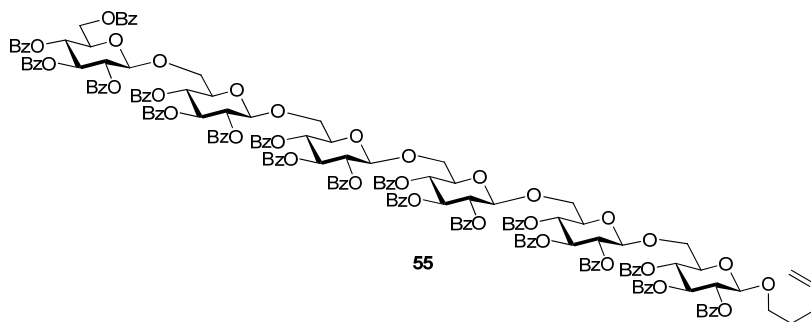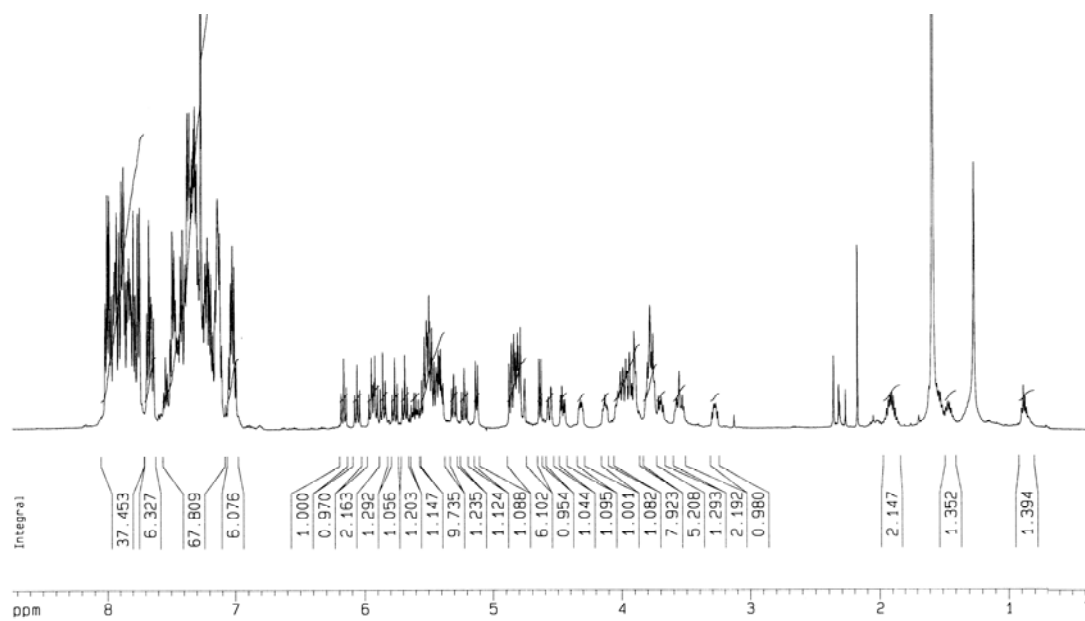

CDCl<sub>3</sub> 500 MHz

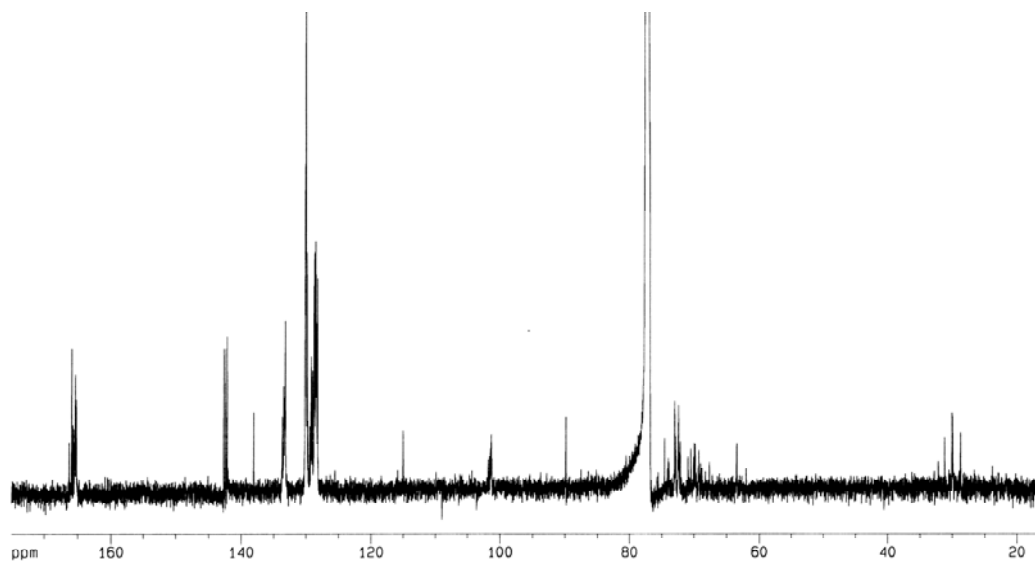

CDCl<sub>3</sub> 125 MHz



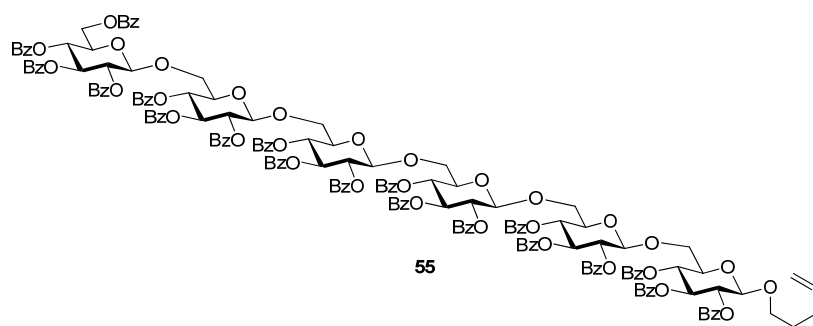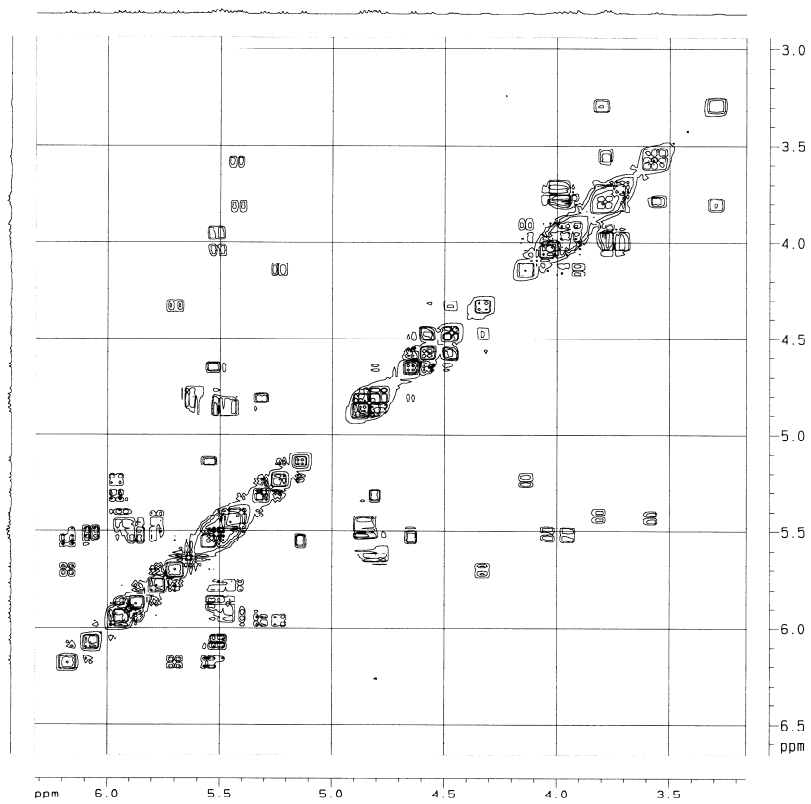

$\text{CDCl}_3$  500 MHz
